# Supplementary material for: Lipid Metabolism is the common pathologic mechanism between Type 2 Diabetes Mellitus and Parkinson's disease
Source: PubMed Central journal article supplement (PMC7378658; doi:10.7150/ijms.46456), 2020-07-06
Supplement: ijmsv17p1723s1.pdf [file ijmsv17p1723s1.pdf]

# Supplementary Figure 2

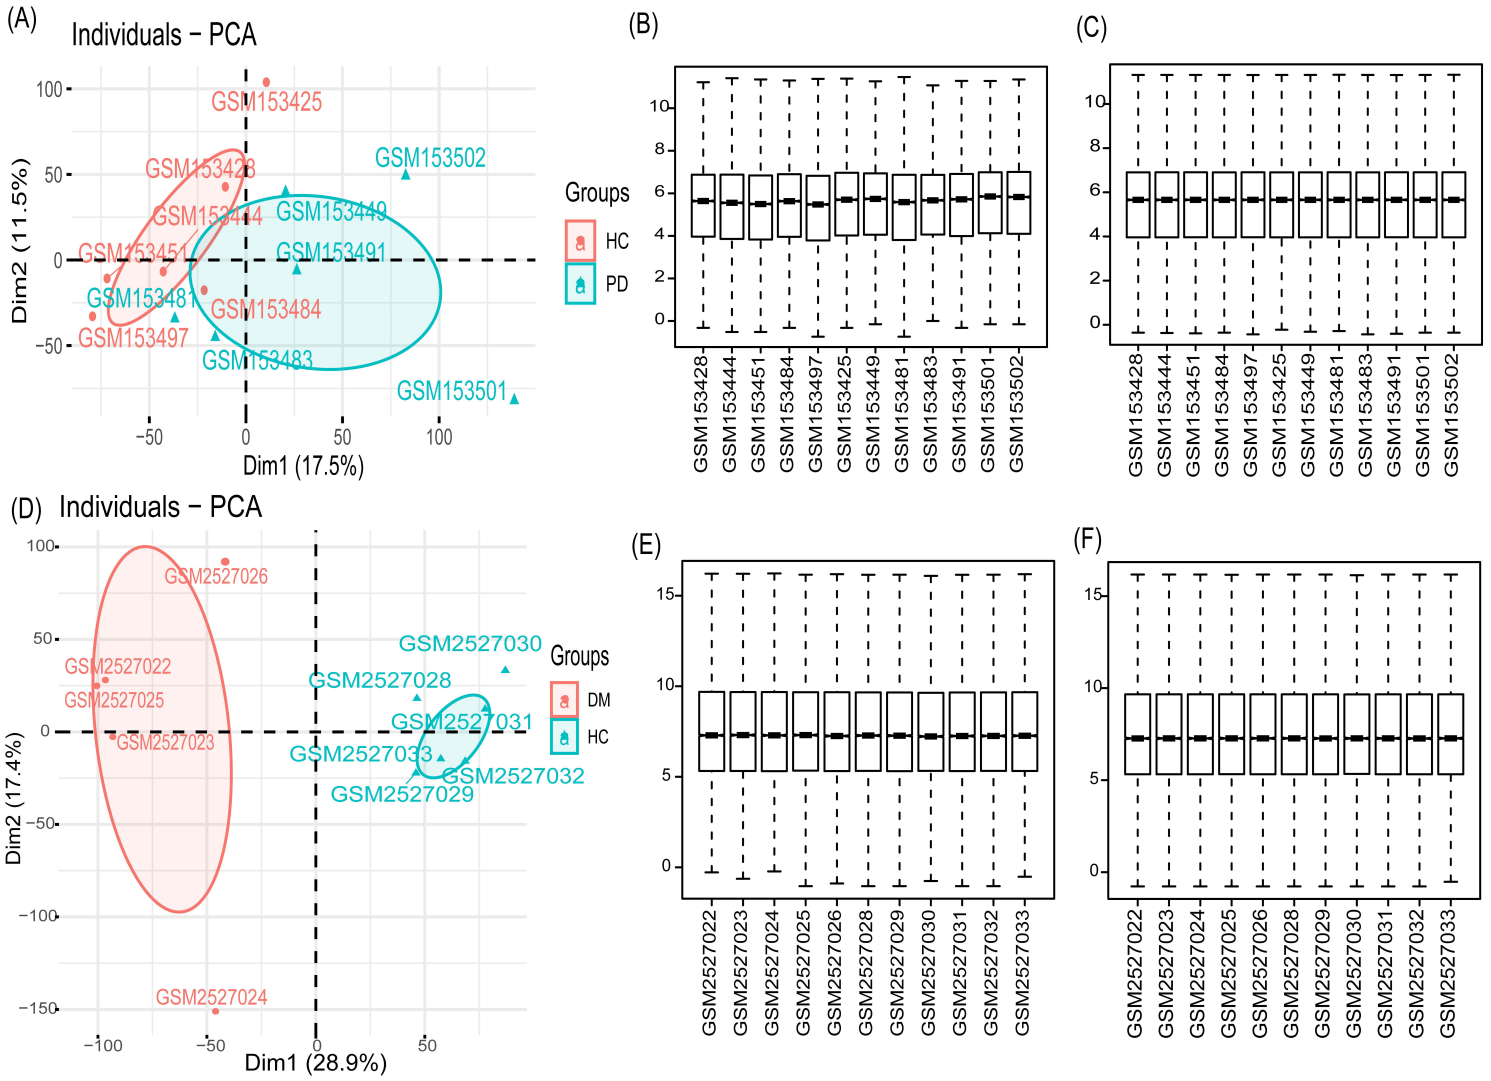

## Supplementary Tables

Supplementary Table 1. The score of 15 hub nodes in the PPI network

| <b>Genes</b> | <b>Betweenness</b> | <b>Closeness</b> | <b>Degree</b> |
|--------------|--------------------|------------------|---------------|
| PLK1         | 541.7583           | 13               | 31.08333      |
| TBL1X        | 409.64957          | 9                | 27.91667      |
| ATRX         | 386.27446          | 11               | 28.58333      |
| SP1          | 364.5728           | 12               | 28.91667      |
| SUB1         | 347.06479          | 9                | 28.25         |
| ARL3         | 305.37381          | 7                | 25.75         |
| RAD51        | 265.42027          | 11               | 29.16667      |
| ATP6V1A      | 257.97857          | 6                | 24.16667      |
| H2AFV        | 238.23874          | 9                | 28            |
| ABHD2        | 213.33333          | 4                | 20.68333      |
| TIMP3        | 143.51299          | 4                | 22.95         |
| ATP7A        | 136.6597           | 7                | 26.33333      |
| IL1RN        | 132.8913           | 5                | 20.38333      |
| CRY1         | 91.03911           | 6                | 24.91667      |
| IL6R         | 0                  | 2                | 17.33333      |

Supplementary Table 2. The predicted TFs of hub nodes in the PPI network

| Track id                                                            | NES     | Transcription factor | Target genes                             |
|---------------------------------------------------------------------|---------|----------------------|------------------------------------------|
| wgEncodeHaibTfbsHct<br>116Sp1V0422111PkRe<br>p1.broadPeak.gz        | 5.28449 | SP1                  | SP1,H2AFV,ABHD2,TBL1X                    |
| GSM1208719_batch2_<br>chrom1_LoVo_CLOCK<br>_PassedQC_peaks_hg<br>19 | 5.07536 | CLOCK                | SP1,ABHD2,CRY1,H2AFV                     |
| GSM1208691_batch1_<br>chrom1_LoVo_TFDP1_<br>PassedQC_peaks_hg1<br>9 | 4.88838 | TFDP1                | H2AFV,AD51,ARL3,PLK1,S<br>P1,ABHD2       |
| wgEncodeSydhTfbsHe<br>pg2CebpzlggrabPk.narr<br>owPeak.gz            | 4.7137  | CEBPZ                | SP1,ABHD2,H2AFV,IL6R,<br>PLK1,CRY1,RAD51 |
| GSM1208789_batch2_<br>chrom1_LoVo_RBCK1_<br>PassedQC_peaks_hg1<br>9 | 4.33481 | RBCK1                | SP1,ABHD2,H2AFV,ARL3,<br>RAD51           |
| GSM1208674_batch1_<br>chrom1_LoVo_SMAD2<br>_PassedQC_peaks_hg<br>19 | 4.11338 | SMAD2                | SP1, ABHD2, ARL3                         |
